# Supplementary material for: Characterization of cardiac involvement in patients with LMNA splice-site mutation–related dilated cardiomyopathy and sudden cardiac death
Source: Front Genet. 2024 Jan 8;14:1291411. doi: 10.3389/fgene.2023.1291411 (PMC10800368; doi:10.3389/fgene.2023.1291411)
Supplement: Supplementary file 1 [file Table2.XLSX]

## Sheet: Sheet1
The dilution ratio and labeled fluorescence of antibody
Antigen repair condition	First antibody	Lot number	Manufactor	First antibody dilution ratio	Opal dye type
Sodium citrate buffer ,PH=6	CD45	AB10558	Abcam,UK	1/500	Opal 540
Sodium citrate buffer ,PH=6	Lamin A/C	AF6065	Affinit,USA	1/200	Opal 520
Sodium citrate buffer ,PH=6	CX43	AB230537	Abcam,UK	1/3000	Opal 570
Sodium citrate buffer ,PH=6	DES	AB32362	Abcam,UK	1/500	Opal 650
